# Supplementary material for: Burden of Stroke in Europe: Thirty-Year Projections of Incidence, Prevalence, Deaths, and Disability-Adjusted Life Years
Source: PubMed Central journal article supplement (PMC7382540; doi:10.1161/strokeaha.120.029606), 2020-07-10
Supplement: str-51-2418-s001.pdf [file str-51-2418-s001.pdf]

## **SUPPLEMENTAL MATERIAL**

### **Burden of stroke in Europe: 30-year projections of incidence, prevalence, deaths, and disability-adjusted life years (DALYs)**

Hatem A Wafa, Charles D. A. Wolfe, Eva Emmet, Gregory A Roth, Catherine O Johnson,  
and Yanzhong Wang

## LIST OF TABLES

|                                                                    |   |
|--------------------------------------------------------------------|---|
| Table I: Models coefficients and goodness of fit in males. ....    | 4 |
| Table II: Models coefficients and goodness of fit in females. .... | 6 |

## LIST OF FIGURES

|                                                                                           |    |
|-------------------------------------------------------------------------------------------|----|
| Figure I: Prediction performance of different models in the UK.....                       | 7  |
| Figure II: Prediction performance of different models in Belgium. ....                    | 7  |
| Figure III: Projected number of incident strokes between 2017 and 2047.....               | 8  |
| Figure IV: Projected number of prevalent strokes between 2017 and 2047.....               | 9  |
| Figure V: Projected number of stroke deaths between 2017 and 2047. ....                   | 10 |
| Figure VI: Projected number of stroke DALYs between 2017 and 2047.....                    | 11 |
| Figure VII: Age- and sex-adjusted incidence rate of stroke in 2017 and 2047. ....         | 12 |
| Figure VIII: Age- and sex-adjusted prevalence rate of stroke in 2017 and 2047.....        | 13 |
| Figure IX: Age- and sex-adjusted mortality rate of stroke in 2017 and 2047. ....          | 14 |
| Figure X: Age- and sex-adjusted rate of DALYs lost because of stroke in 2017 and 2047.... | 15 |

| Age Group | Parameter | Incidence  |            |             | Prevalence |            |             | Death      |            |             | DALYs        |            |             |
|-----------|-----------|------------|------------|-------------|------------|------------|-------------|------------|------------|-------------|--------------|------------|-------------|
|           |           | Linear     | Poisson    | Exponential | Linear     | Poisson    | Exponential | Linear     | Poisson    | Exponential | Linear       | Poisson    | Exponential |
| 0-19      | Years     | -0.569941* | -0.021427* | -0.019834*  | -5.499448* | -0.026614* | -0.023579*  | -0.067717* | -0.051268* | -0.056122*  | -5.509371*   | -0.035163* | -0.036223*  |
|           | GDP       | 2.6e-05*   | 1e-06*     | 2e-06*      | 0.001205*  | 6e-06*     | 6e-06*      | -1.2e-05*  | -1e-05*    | -9e-06*     | -0.001287*   | -9e-06*    | -8e-06*     |
|           | AIC       | 551.0242   | Inf        | 156.929**   | 932.6114** | Inf        | 969.806     | 143.811**  | Inf        | 731.875     | 812.4855     | Inf        | 176.592**   |
| 20-24     | Years     | -0.053016* | -0.006402* | -0.006397*  | -1.725499* | -0.014368* | -0.013784*  | -0.044778* | -0.03732*  | -0.042671*  | -2.995584*   | -0.028457* | -0.030882*  |
|           | GDP       | -4.8e-05*  | -7e-06*    | -6e-06*     | 0.000182*  | 2e-06*     | 2e-06*      | -1.6e-05*  | -1.7e-05*  | -1.3e-05*   | -0.001272*   | -1.5e-05*  | -1.2e-05*   |
|           | AIC       | 245.4682   | Inf        | -784.318**  | 756.4926   | Inf        | 378.741**   | 117.0295** | Inf        | 696.968     | 756.97       | Inf        | 323.916**   |
| 25-29     | Years     | -0.062496* | -0.004199* | -0.004466*  | -1.300165* | -0.007328* | -0.007061*  | -0.06173*  | -0.030436* | -0.036099*  | -3.774259*   | -0.023839* | -0.026832*  |
|           | GDP       | -0.000122* | -1.1e-05*  | -9e-06*     | -0.000638* | -4e-06*    | -3e-06*     | -3.7e-05*  | -2.6e-05*  | -1.9e-05*   | -0.002522*   | -2.3e-05*  | -1.6e-05*   |
|           | AIC       | 343.2588   | Inf        | -494.556**  | 771.7045   | Inf        | -122.202**  | 194.2332** | Inf        | 784.684     | 822.6137     | Inf        | 454.601**   |
| 30-34     | Years     | -0.122258* | -0.004103* | -0.004721*  | -1.305753* | -0.004602* | -0.004746*  | -0.099894* | -0.022458* | -0.030939*  | -5.553172*   | -0.018422* | -0.023983*  |
|           | GDP       | -0.000259* | -1.2e-05*  | -1e-05*     | -0.00192*  | -8e-06*    | -7e-06*     | -9.3e-05*  | -3.7e-05*  | -2.6e-05*   | -0.005714*   | -3.3e-05*  | -2.3e-05*   |
|           | AIC       | 446.9793   | Inf        | -468.255**  | 817.8775   | Inf        | -258.278**  | 295.726**  | Inf        | 749.199     | 911.5821     | Inf        | 505.304**   |
| 35-39     | Years     | -0.237246* | -0.00461*  | -0.005502*  | -1.589135* | -0.003185* | -0.003532*  | -0.181236* | -0.018595* | -0.028785*  | -9.115821*   | -0.015495* | -0.022909*  |
|           | GDP       | -0.000447* | -1.2e-05*  | -1e-05*     | -0.003584* | -9e-06*    | -8e-06*     | -0.000206* | -4.3e-05*  | -2.8e-05*   | -0.011443*   | -3.9e-05*  | -2.5e-05*   |
|           | AIC       | 540.7436   | Inf        | -397.082**  | 872.9555   | Inf        | -426.999**  | 418.7304** | Inf        | 920.377     | 1021.3376    | Inf        | 745.984**   |
| 40-44     | Years     | -0.223551* | -0.001466* | -0.00282*   | -1.08753   | -0.000568* | -0.001307   | -0.292984* | -0.010531* | -0.024341*  | -13.239643*  | -0.00886*  | -0.019515*  |
|           | GDP       | -0.001076* | -1.5e-05*  | -1.3e-05*   | -0.008263  | -1.4e-05*  | -0.000011   | -0.000491* | -5.3e-05*  | -3.3e-05*   | -0.024264*   | -4.8e-05*  | -3e-05*     |
|           | AIC       | 650.9485   | Inf        | -255.651**  | 968.7138   | Inf        | -315.551**  | 538.0685** | Inf        | 1010.402    | 1125.2386    | Inf        | 871.31**    |
| 45-49     | Years     | -0.07692   | 0.001065*  | -0.000588   | -0.378686  | 0.000846*  | -0.000313   | -0.418187* | -0.004748* | -0.019069*  | -16.581917*  | -0.003573* | -0.015039*  |
|           | GDP       | -0.0021    | -1.8e-05*  | -0.000015   | -0.015272  | -1.5e-05*  | -0.000012   | -0.000962* | -5.6e-05*  | -3.4e-05*   | -0.042656*   | -5.2e-05*  | -3.2e-05*   |
|           | AIC       | 741.8795   | Inf        | -142.723**  | 1062.8467  | Inf        | -183.593**  | 632.7535** | Inf        | 1007.621    | 1203.9221    | Inf        | 890.926**   |
| 50-54     | Years     | 0.197291   | 0.002965*  | 0.000886    | 0.088305   | 0.001585*  | 0.000168    | -0.631859* | -0.00103   | -0.016011*  | -21.874334*  | -0.000165  | -0.01228*   |
|           | GDP       | -0.003895  | -2.1e-05*  | -0.000017   | -0.028083  | -1.8e-05*  | -0.000014   | -0.001818* | -0.00006   | -3.6e-05*   | -0.071815*   | -0.000056  | -3.4e-05*   |
|           | AIC       | 830.1925   | Inf        | -30.649**   | 1154.2813  | Inf        | -31.739**   | 729.4504** | Inf        | 1115.814    | 1283.2333    | Inf        | 1001.639**  |
| 55-59     | Years     | 1.139532*  | 0.005778*  | 0.003028*   | 6.191679   | 0.004115*  | 0.002054    | -0.979391* | 0.000835   | -0.015554*  | -28.18128*   | 0.002034*  | -0.011429*  |
|           | GDP       | -0.006421* | -2.4e-05*  | -1.8e-05*   | -0.05043   | -2.1e-05*  | -0.000016   | -0.003222* | -0.000062  | -3.7e-05*   | -0.112446*   | -5.8e-05*  | -3.5e-05*   |
|           | AIC       | 904.1503   | Inf        | 69.363**    | 1237.1123  | Inf        | 107.692**   | 813.8462** | Inf        | 1129.73     | 1348.8309    | Inf        | 1026.75**   |
| 60-64     | Years     | 1.361238*  | 0.005413*  | 0.001816    | 13.865515* | 0.00558*   | 0.003008*   | -1.955617* | -0.001162* | -0.018078*  | -47.502461*  | 0.000757*  | -0.013555*  |
|           | GDP       | -0.009466* | -2.5e-05*  | -0.000018   | -0.080572* | -2.3e-05*  | -1.7e-05*   | -0.005641* | -5.9e-05*  | -3.6e-05*   | -0.16979*    | -5.6e-05*  | -3.4e-05*   |
|           | AIC       | 963.16     | Inf        | 114.434**   | 1303.0883  | Inf        | 174.083**   | 898.0688** | Inf        | 1136.181    | 1410.5979    | Inf        | 1046.304**  |
| 65-69     | Years     | 1.600244   | 0.005046*  | 0.000535    | 27.401899* | 0.006958*  | 0.003972*   | -3.91492*  | -0.004892* | -0.021514*  | -78.990465*  | -0.002202* | -0.01664*   |
|           | GDP       | -0.012747  | -2.5e-05*  | -0.000018   | -0.108524* | -2.3e-05*  | -1.7e-05*   | -0.009069* | -5.3e-05*  | -3.3e-05*   | -0.228703*   | -5.1e-05*  | -3.2e-05*   |
|           | AIC       | 1012.3594  | Inf        | 173.563**   | 1345.1278  | Inf        | 154.244**   | 971.2901** | Inf        | 1069.765    | 1456.3759    | Inf        | 993.481**   |
| 70-74     | Years     | 0.207662   | 0.00238*   | -0.001857   | 34.29929*  | 0.006503*  | 0.003795*   | -9.462104* | -0.012355* | -0.026071*  | -161.391338* | -0.009123* | -0.020966*  |
|           | GDP       | -0.015708  | -2.2e-05*  | -0.000017   | -0.132244* | -2.2e-05*  | -1.6e-05*   | -0.014264* | -4.4e-05*  | -2.9e-05*   | -0.290212*   | -4.3e-05*  | -2.8e-05*   |
|           | AIC       | 1048.4037  | Inf        | 100.505**   | 1374.6473  | Inf        | 89.508**    | 1044.797   | Inf        | 925.54**    | 1496.4453    | Inf        | 843.985**   |

|              |              |             |            |            |             |           |            |             |            |            |              |            |            |
|--------------|--------------|-------------|------------|------------|-------------|-----------|------------|-------------|------------|------------|--------------|------------|------------|
| <b>75-79</b> | <b>Years</b> | -1.984921   | -0.000007  | -0.003717* | 47.204485*  | 0.006452* | 0.004143*  | -18.394946* | -0.016973* | -0.027347* | -246.913826* | -0.013475* | -0.022439* |
|              | <b>GDP</b>   | -0.018191   | -0.000018  | -1.5e-05*  | -0.140095*  | -1.8e-05* | -1.4e-05*  | -0.020463*  | -3.4e-05*  | -2.3e-05*  | -0.324184*   | -3.3e-05*  | -2.3e-05*  |
|              | <b>AIC</b>   | 1080.4041   | Inf        | 20.021**   | 1384.5808   | Inf       | -76.354**  | 1111.6524   | Inf        | 762.605**  | 1523.3824    | Inf        | 672.816**  |
| <b>80-84</b> | <b>Years</b> | -6.408331*  | -0.003023* | -0.005248* | 83.075201*  | 0.008475* | 0.006498*  | -27.867657* | -0.016701* | -0.023963* | -274.453082* | -0.013294* | -0.019557* |
|              | <b>GDP</b>   | -0.018299*  | -1.3e-05*  | -1.1e-05*  | -0.127202*  | -1.4e-05* | -1.1e-05*  | -0.027204*  | -2.5e-05*  | -1.8e-05*  | -0.320264*   | -2.5e-05*  | -1.8e-05*  |
|              | <b>AIC</b>   | 1104.9504   | Inf        | -167.818** | 1385.2735   | Inf       | -219.191** | 1169.1972   | Inf        | 573.75**   | 1534.1067    | Inf        | 471.275**  |
| <b>85-89</b> | <b>Years</b> | -15.083111* | -0.006752* | -0.0076*   | 116.266241* | 0.010598* | 0.009257*  | -34.784979* | -0.014115* | -0.017968* | -237.796039* | -0.010987* | -0.014304* |
|              | <b>GDP</b>   | -0.016143*  | -9e-06*    | -7e-06*    | -0.09886*   | -1e-05*   | -8e-06*    | -0.032026*  | -1.8e-05*  | -1.4e-05*  | -0.270441*   | -1.8e-05*  | -1.4e-05*  |
|              | <b>AIC</b>   | 1139.9675   | Inf        | -260.405** | 1383.5937   | Inf       | -286.348** | 1223.6051   | Inf        | 402.992**  | 1535.6966    | Inf        | 288.291**  |
| <b>90-94</b> | <b>Years</b> | -19.89117*  | -0.007747* | -0.008648* | 142.555187* | 0.013211* | 0.012523*  | -47.264285* | -0.014362* | -0.016607* | -215.94479*  | -0.010976* | -0.012738* |
|              | <b>GDP</b>   | -0.013432*  | -6e-06*    | -5e-06*    | -0.069496*  | -7e-06*   | -6e-06*    | -0.032647*  | -1.2e-05*  | -1e-05*    | -0.191217*   | -1.2e-05*  | -1e-05*    |
|              | <b>AIC</b>   | 1175.701    | Inf        | -181.122** | 1407.5923   | Inf       | -67.242**  | 1263.2348   | Inf        | 282.315**  | 1517.0982    | Inf        | 148.502**  |
| <b>95+</b>   | <b>Years</b> | -4.840201   | -0.001601* | -0.003458* | 232.429596* | 0.023252* | 0.020672*  | -14.132521  | -0.002466* | -0.006302* | -13.327837   | -0.000116* | -0.003366  |
|              | <b>GDP</b>   | -0.012419   | -5e-06*    | -3e-06*    | -0.056885*  | -6e-06*   | -3e-06*    | -0.045688   | -1.2e-05*  | -9e-06*    | -0.159479    | -1.2e-05*  | -0.000008  |
|              | <b>AIC</b>   | 1260.9626   | Inf        | 446.471**  | 1489.264    | Inf       | 678.162**  | 1366.3943   | Inf        | 773.812**  | 1549.6182    | Inf        | 667.476**  |

**Table I: Models coefficients and goodness of fit based on the AIC criteria for each stroke measure by age groups in males.**

\* denotes significant coefficient ( $p < 0.05$ ).

\*\* indicates the selected model (lowest AIC).

Abbreviations: AIC, Akaike information criterion; and GDP, gross domestic product per capita adjusted for purchasing power parity in 2011 US Dollars.

| Age Group | Parameter | Incidence  |            |            | Prevalence |            |            | Death      |            |            | DALYs        |            |            |
|-----------|-----------|------------|------------|------------|------------|------------|------------|------------|------------|------------|--------------|------------|------------|
|           |           | Model 1    | Model 2    | Model 3    | Model 1    | Model 2    | Model 3    | Model 1    | Model 2    | Model 3    | Model 1      | Model 2    | Model 3    |
| 0-19      | Years     | -0.333107* | -0.011659* | -0.011018* | -2.537525* | -0.012284* | -0.010465* | -0.051215* | -0.049019* | -0.052263* | -3.83362*    | -0.025722* | -0.026004* |
|           | GDP       | -8.7e-05*  | -3e-06*    | -2e-06*    | 0.00026*   | 1e-06*     | 2e-06*     | -4e-06*    | -4e-06*    | -3e-06*    | -0.000923*   | -7e-06*    | -6e-06*    |
|           | AIC       | 527.4975   | Inf        | -101.752** | 887.5231   | Inf        | 777.472**  | 108.7079** | Inf        | 841.917    | 784.0906     | Inf        | 45.98**    |
| 20-24     | Years     | -0.012107* | -0.001021  | -0.001329* | -0.019087  | 0.000181   | 0.000107   | -0.032003* | -0.036438* | -0.040967* | -1.985734*   | -0.021608* | -0.023194* |
|           | GDP       | -6.3e-05*  | -0.000008  | -7e-06*    | -0.00094   | -0.000008  | -0.000006  | -1e-05*    | -1.3e-05*  | -1e-05*    | -0.000957*   | -1.3e-05*  | -1e-05*    |
|           | AIC       | 243.5325   | Inf        | -906.509** | 741.415    | Inf        | 16.091**   | 45.5829**  | Inf        | 583.825    | 697.3852     | Inf        | 7.045**    |
| 25-29     | Years     | -0.003475  | 0.00027    | -0.000102  | 0.07088    | 0.000635   | 0.000433   | -0.05027*  | -0.037117* | -0.043028* | -2.847673*   | -0.022431* | -0.025061* |
|           | GDP       | -0.000126  | -0.00001   | -0.000008  | -0.001228  | -0.000007  | -0.000006  | -1.5e-05*  | -1.3e-05*  | -9e-06*    | -0.001376*   | -1.3e-05*  | -1e-05*    |
|           | AIC       | 334.1322   | Inf        | -750.617** | 762.5498   | Inf        | -288.446** | 104.6761** | Inf        | 489.445    | 747.7216     | Inf        | -2.738**   |
| 30-34     | Years     | -0.091098* | -0.003259* | -0.003463* | 0.38743    | 0.001694*  | 0.001308   | -0.079373* | -0.033346* | -0.038747* | -4.116911*   | -0.021017* | -0.023831* |
|           | GDP       | -0.000169* | -7e-06*    | -6e-06*    | -0.002332  | -9e-06*    | -0.000007  | -3.2e-05*  | -1.7e-05*  | -1.3e-05*  | -0.002591*   | -1.7e-05*  | -1.3e-05*  |
|           | AIC       | 401.0426   | Inf        | -920.86**  | 812.4511   | Inf        | -417.603** | 205.1058** | Inf        | 609.678    | 832.8022     | Inf        | 184.807**  |
| 35-39     | Years     | -0.283276* | -0.006659* | -0.007013* | 0.221467   | 0.000943*  | 0.000581   | -0.150417* | -0.031882* | -0.038992* | -7.268494*   | -0.021842* | -0.025922* |
|           | GDP       | -0.000176* | -5e-06*    | -4e-06*    | -0.00398   | -9e-06*    | -0.000008  | -7.3e-05*  | -2.1e-05*  | -1.4e-05*  | -0.004916*   | -2e-05*    | -1.4e-05*  |
|           | AIC       | 485.2766   | Inf        | -733.151** | 864.7858   | Inf        | -668.988** | 306.4725** | Inf        | 586.293    | 920.3755     | Inf        | 276.613**  |
| 40-44     | Years     | -0.366346* | -0.004883* | -0.005628* | -0.287851  | 0.000101   | -0.000293  | -0.242791* | -0.024608* | -0.032446* | -10.64093*   | -0.017522* | -0.02251*  |
|           | GDP       | -0.000511* | -8e-06*    | -7e-06*    | -0.006228  | -0.00001   | -0.000008  | -0.000188* | -3e-05*    | -2e-05*    | -0.010505*   | -2.8e-05*  | -1.9e-05*  |
|           | AIC       | 597.0921   | Inf        | -409.4**   | 934.5924   | Inf        | -650.831** | 413.5503** | Inf        | 564.268    | 1011.2821    | Inf        | 342.342**  |
| 45-49     | Years     | -0.366651* | -0.0026*   | -0.003775* | -0.477491  | 0.000192   | -0.000418  | -0.373927* | -0.018722* | -0.028045* | -14.578784*  | -0.013212* | -0.019559* |
|           | GDP       | -0.001132* | -1.2e-05*  | -1e-05*    | -0.01069   | -0.000011  | -0.000009  | -0.000402* | -3.7e-05*  | -2.3e-05*  | -0.019647*   | -3.4e-05*  | -2.2e-05*  |
|           | AIC       | 694.9057   | Inf        | -166.532** | 1019.6916  | Inf        | -458.428** | 517.7485** | Inf        | 688.612    | 1097.8991    | Inf        | 513.879**  |
| 50-54     | Years     | -0.400247* | -0.001208* | -0.002894* | -1.550938  | -0.000038  | -0.000908  | -0.554508* | -0.013837* | -0.023869* | -19.074905*  | -0.009285* | -0.016248* |
|           | GDP       | -0.002127* | -1.6e-05*  | -1.3e-05*  | -0.019008  | -0.000013  | -0.00001   | -0.000784* | -4.6e-05*  | -2.7e-05*  | -0.033859*   | -4.1e-05*  | -2.5e-05*  |
|           | AIC       | 770.6347   | Inf        | -38.587**  | 1108.4757  | Inf        | -238.063** | 617.4984** | Inf        | 831.042    | 1179.7727    | Inf        | 679.122**  |
| 55-59     | Years     | -0.185381  | 0.001006*  | -0.001485  | -0.374178  | 0.001087*  | -0.000363  | -0.906354* | -0.011774* | -0.023915* | -26.616641*  | -0.007088* | -0.015745* |
|           | GDP       | -0.00346   | -2e-05*    | -0.000016  | -0.033126  | -1.6e-05*  | -0.000012  | -0.001433* | -5.3e-05*  | -3e-05*    | -0.054458*   | -4.7e-05*  | -2.8e-05*  |
|           | AIC       | 831.9758   | Inf        | 56.838**   | 1190.3113  | Inf        | -40.708**  | 707.336**  | Inf        | 984.69     | 1250.7626    | Inf        | 832.807**  |
| 60-64     | Years     | -0.096599  | 0.002049*  | -0.000917  | 1.076533   | 0.001961*  | -0.000122  | -1.822079* | -0.014214* | -0.027678* | -45.729131*  | -0.008706* | -0.018765* |
|           | GDP       | -0.005614  | -2.3e-05*  | -0.000017  | -0.053772  | -1.9e-05*  | -0.000014  | -0.002592* | -5.3e-05*  | -3e-05*    | -0.084553*   | -4.8e-05*  | -2.9e-05*  |
|           | AIC       | 893.6774   | Inf        | 107.241**  | 1259.6859  | Inf        | 97.46**    | 799.517**  | Inf        | 1096.266   | 1319.6999    | Inf        | 949.764**  |
| 65-69     | Years     | 0.275382   | 0.003271*  | -0.000063  | 9.546429   | 0.004091*  | 0.00132    | -3.841461* | -0.016364* | -0.031565* | -79.860655*  | -0.010472* | -0.022427* |
|           | GDP       | -0.008453  | -2.4e-05*  | -0.000018  | -0.081081  | -2.1e-05*  | -0.000016  | -0.005001* | -5.2e-05*  | -3.1e-05*  | -0.133992*   | -4.9e-05*  | -2.9e-05*  |
|           | AIC       | 951.3383   | Inf        | 172.622**  | 1313.1884  | Inf        | 187.319**  | 895.1313** | Inf        | 1094.388   | 1385.7901    | Inf        | 971.709**  |
| 70-74     | Years     | -0.116798  | 0.002436*  | -0.001328  | 20.275989* | 0.005616*  | 0.002629*  | -8.765941* | -0.020309* | -0.034421* | -149.732809* | -0.014579* | -0.026009* |
|           | GDP       | -0.012742  | -2.4e-05*  | -0.000018  | -0.112791* | -2.3e-05*  | -1.7e-05*  | -0.009541* | -4.5e-05*  | -2.8e-05*  | -0.202503*   | -4.4e-05*  | -2.7e-05*  |
|           | AIC       | 1007.7853  | Inf        | 140.071**  | 1355.0623  | Inf        | 224.75**   | 994.5277** | Inf        | 1028.922   | 1449.3022    | Inf        | 920.402**  |

|              |              |             |            |            |             |           |            |             |            |            |              |            |            |
|--------------|--------------|-------------|------------|------------|-------------|-----------|------------|-------------|------------|------------|--------------|------------|------------|
| <b>75-79</b> | <b>Years</b> | -0.98649    | 0.001507*  | -0.002828* | 41.058041*  | 0.007383* | 0.004415*  | -16.740892* | -0.01957*  | -0.032219* | -222.25333*  | -0.014798* | -0.025258* |
|              | <b>GDP</b>   | -0.0185     | -2.3e-05*  | -1.8e-05*  | -0.141559*  | -2.3e-05* | -1.7e-05*  | -0.017705*  | -3.9e-05*  | -2.5e-05*  | -0.286032*   | -3.8e-05*  | -2.5e-05*  |
|              | <b>AIC</b>   | 1067.1209   | Inf        | 169.632**  | 1384.3943   | Inf       | 177.325**  | 1085.8789   | Inf        | 882.276**  | 1499.6231    | Inf        | 781.471**  |
| <b>80-84</b> | <b>Years</b> | -4.4926*    | -0.001547* | -0.004349* | 82.848716*  | 0.010245* | 0.007567*  | -25.642046* | -0.01604*  | -0.025409* | -246.556231* | -0.01208*  | -0.02012*  |
|              | <b>GDP</b>   | -0.021*     | -1.7e-05*  | -1.4e-05*  | -0.152068*  | -1.9e-05* | -1.5e-05*  | -0.028542*  | -3.1e-05*  | -2.1e-05*  | -0.340289*   | -3e-05*    | -2.1e-05*  |
|              | <b>AIC</b>   | 1098.3412   | Inf        | -84.942**  | 1396.4612   | Inf       | 45.998**   | 1163.1378   | Inf        | 694.503**  | 1530.0356    | Inf        | 601.981**  |
| <b>85-89</b> | <b>Years</b> | -12.053649* | -0.005135* | -0.006498* | 118.181585* | 0.012048* | 0.010389*  | -31.266005* | -0.012001* | -0.017612* | -205.667088* | -0.008734* | -0.013594* |
|              | <b>GDP</b>   | -0.020506*  | -1.2e-05*  | -1e-05*    | -0.133862*  | -1.5e-05* | -1.2e-05*  | -0.037598*  | -2.2e-05*  | -1.6e-05*  | -0.320692*   | -2.2e-05*  | -1.6e-05*  |
|              | <b>AIC</b>   | 1132.9152   | Inf        | -286.482** | 1393.9186   | Inf       | -116.766** | 1222.8373   | Inf        | 448.368**  | 1537.4938    | Inf        | 357.571**  |
| <b>90-94</b> | <b>Years</b> | -18.149367* | -0.006755* | -0.007912* | 137.246856* | 0.013572* | 0.012705*  | -39.408615* | -0.010657* | -0.014276* | -170.511348* | -0.007541* | -0.010532* |
|              | <b>GDP</b>   | -0.019773*  | -9e-06*    | -7e-06*    | -0.103192*  | -1.1e-05* | -9e-06*    | -0.0449*    | -1.7e-05*  | -1.3e-05*  | -0.262715*   | -1.7e-05*  | -1.3e-05*  |
|              | <b>AIC</b>   | 1152.7056   | Inf        | -402.471** | 1388.9202   | Inf       | -162.056** | 1270.4505   | Inf        | 281.495**  | 1526.5578    | Inf        | 178.986**  |
| <b>95+</b>   | <b>Years</b> | -15.220984* | -0.005016* | -0.006024* | 174.132807* | 0.01837*  | 0.016856*  | -23.493619* | -0.003998* | -0.007044* | -43.465139   | -0.001548* | -0.004225* |
|              | <b>GDP</b>   | -0.020062*  | -8e-06*    | -7e-06*    | -0.083201*  | -9e-06*   | -8e-06*    | -0.056322*  | -1.5e-05*  | -1.1e-05*  | -0.2027      | -1.5e-05*  | -1.2e-05*  |
|              | <b>AIC</b>   | 1200.1054   | Inf        | -27.87**   | 1424.6332   | Inf       | 311.252**  | 1328.5702   | Inf        | 383.322**  | 1512.7313    | Inf        | 319.679**  |

**Table II: Models coefficients and goodness of fit based on the AIC criteria for each stroke measure by age groups in females.**

\* denotes significant coefficient ( $p < 0.05$ ).

\*\* indicates the selected model (lowest AIC).

Abbreviations: AIC, Akaike information criterion; and GDP, gross domestic product per capita adjusted for purchasing power parity in 2011 US Dollars.

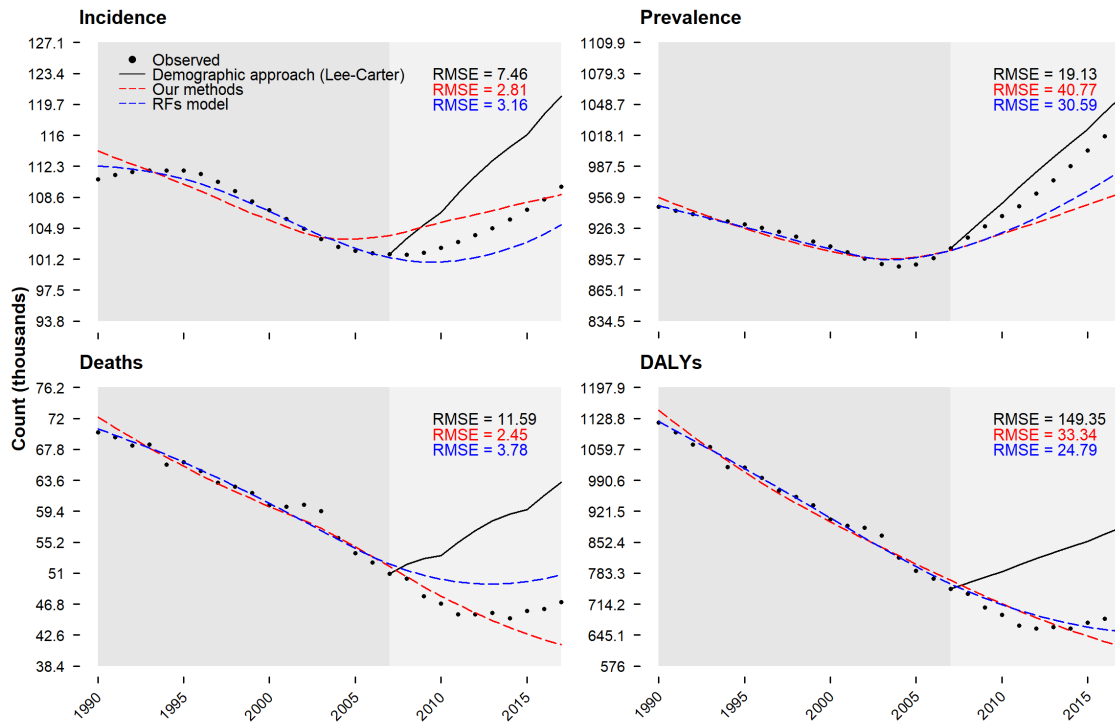

**Figure I: Prediction performance of different models in the UK.**

Demographic approach assumes constant age-specific rates and apply those to the corresponding populations in each prediction year. RFs model is a regression model adjusted for the changes in prevalence of hypertension, diabetes mellitus, and atrial fibrillation.

Abbreviations: RFs, risk factors; RMSE, root mean squared error; and DALYs, disability-adjusted life years.

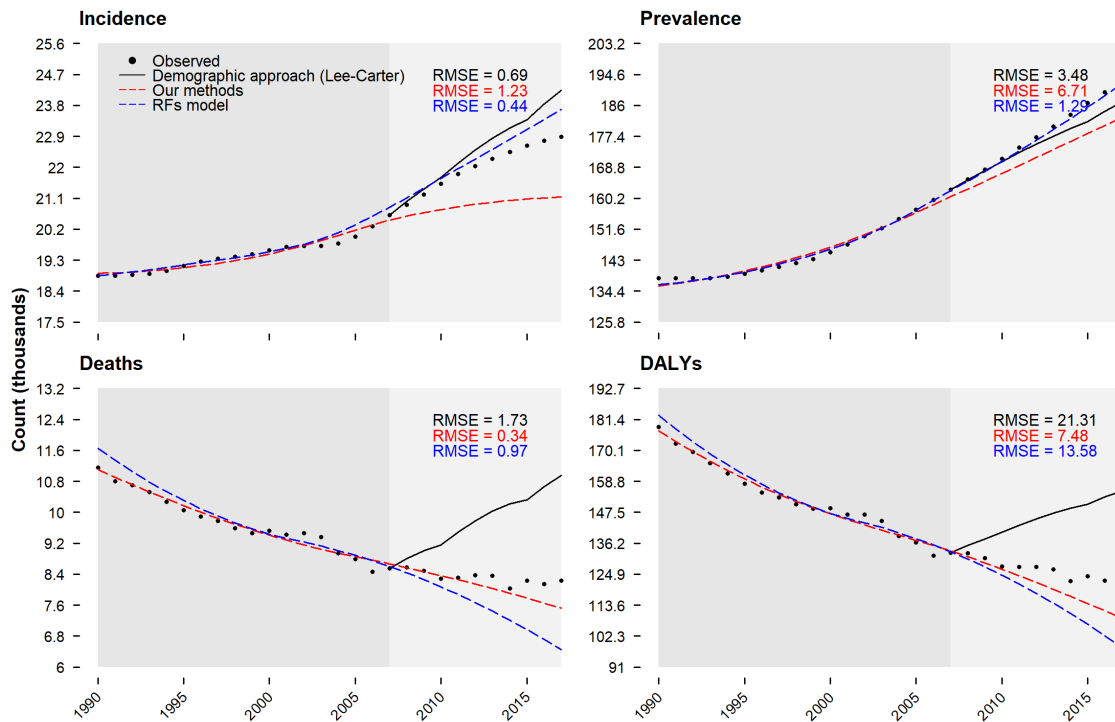

**Figure II: Prediction performance of different models in Belgium.**

Demographic approach assumes constant age-specific rates and apply those to the corresponding populations in each prediction year. RFs model is a regression model adjusted for the changes in prevalence of hypertension, diabetes mellitus, and atrial fibrillation.

Abbreviations: RFs, risk factors; RMSE, root mean squared error; and DALYs, disability-adjusted life years.

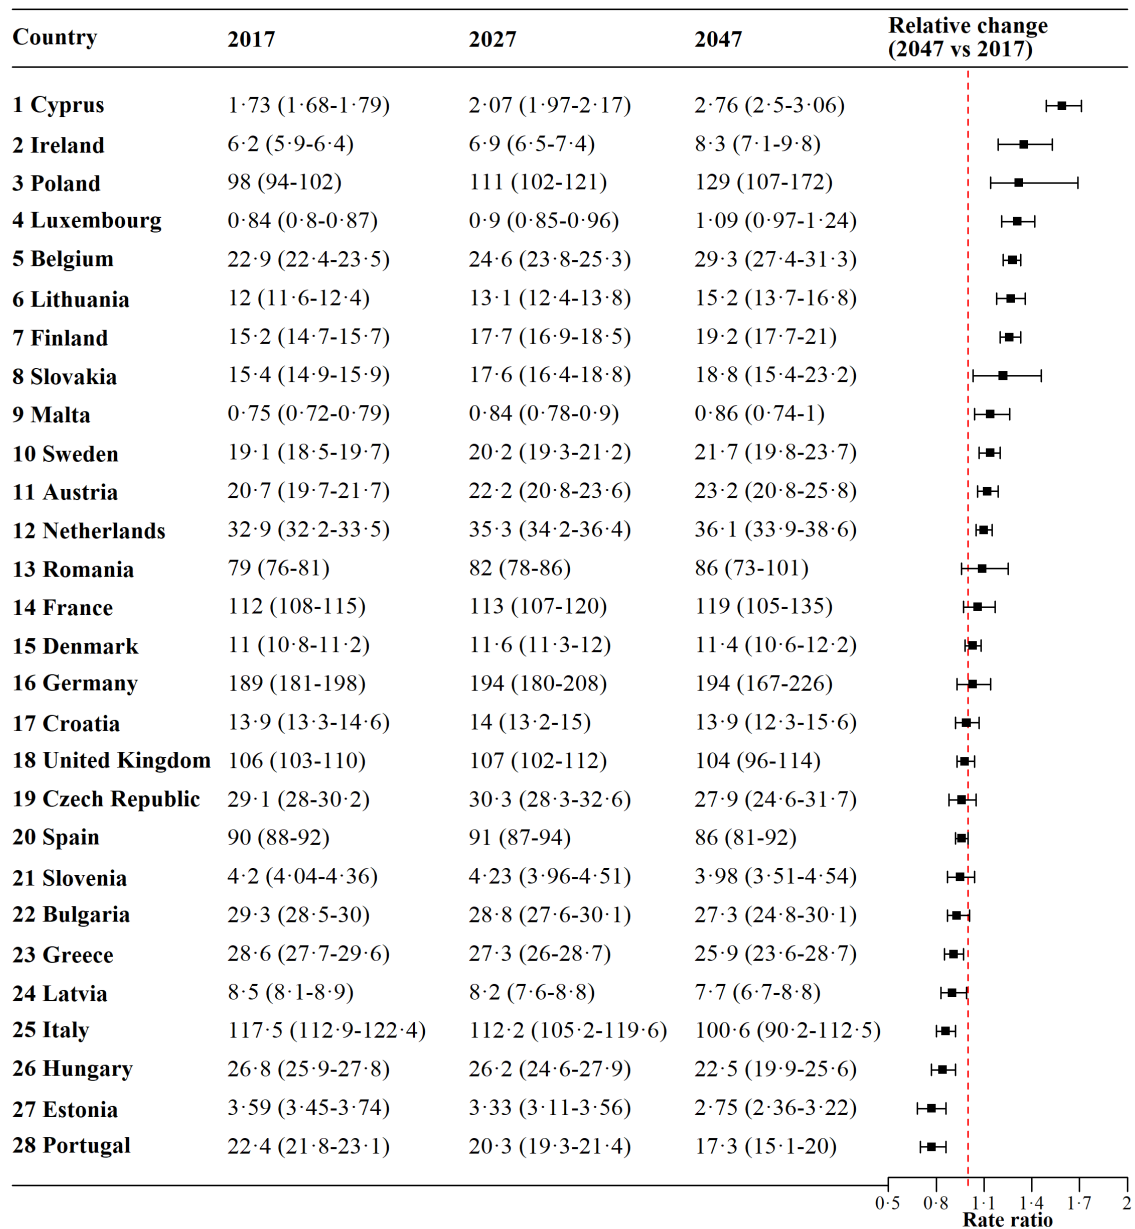

**Figure III: Projected number of incident strokes (in thousands) between 2017 and 2047 in European countries.**

Data are counts in thousands (95% CI) as obtained from models.



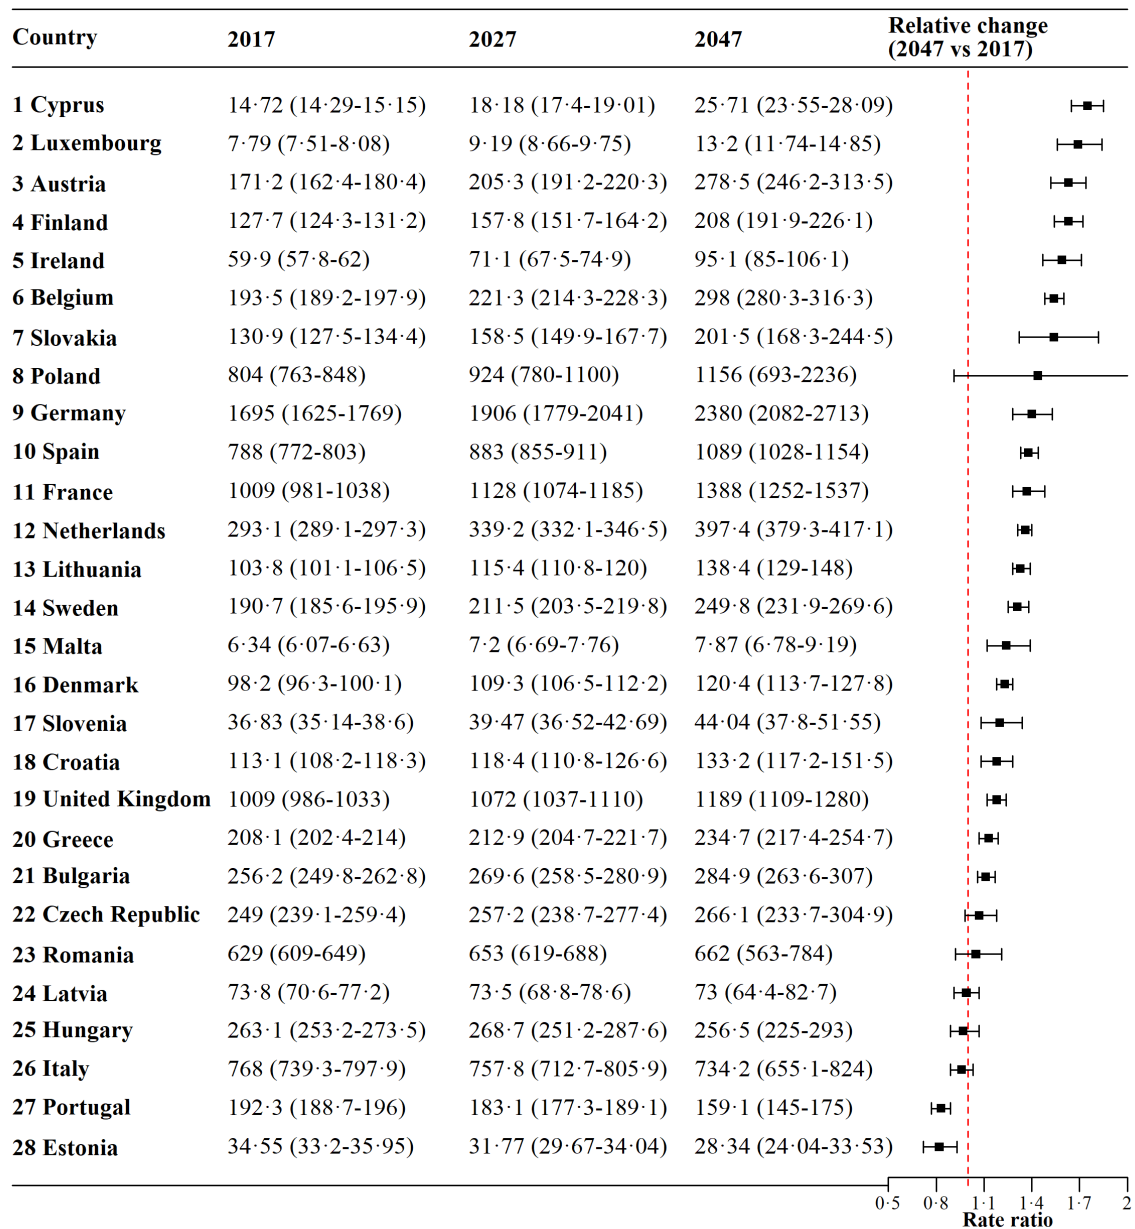

**Figure IV: Projected number of prevalent strokes (in thousands) between 2017 and 2047 in European countries.**

Data are counts in thousands (95% CI) as obtained from models.

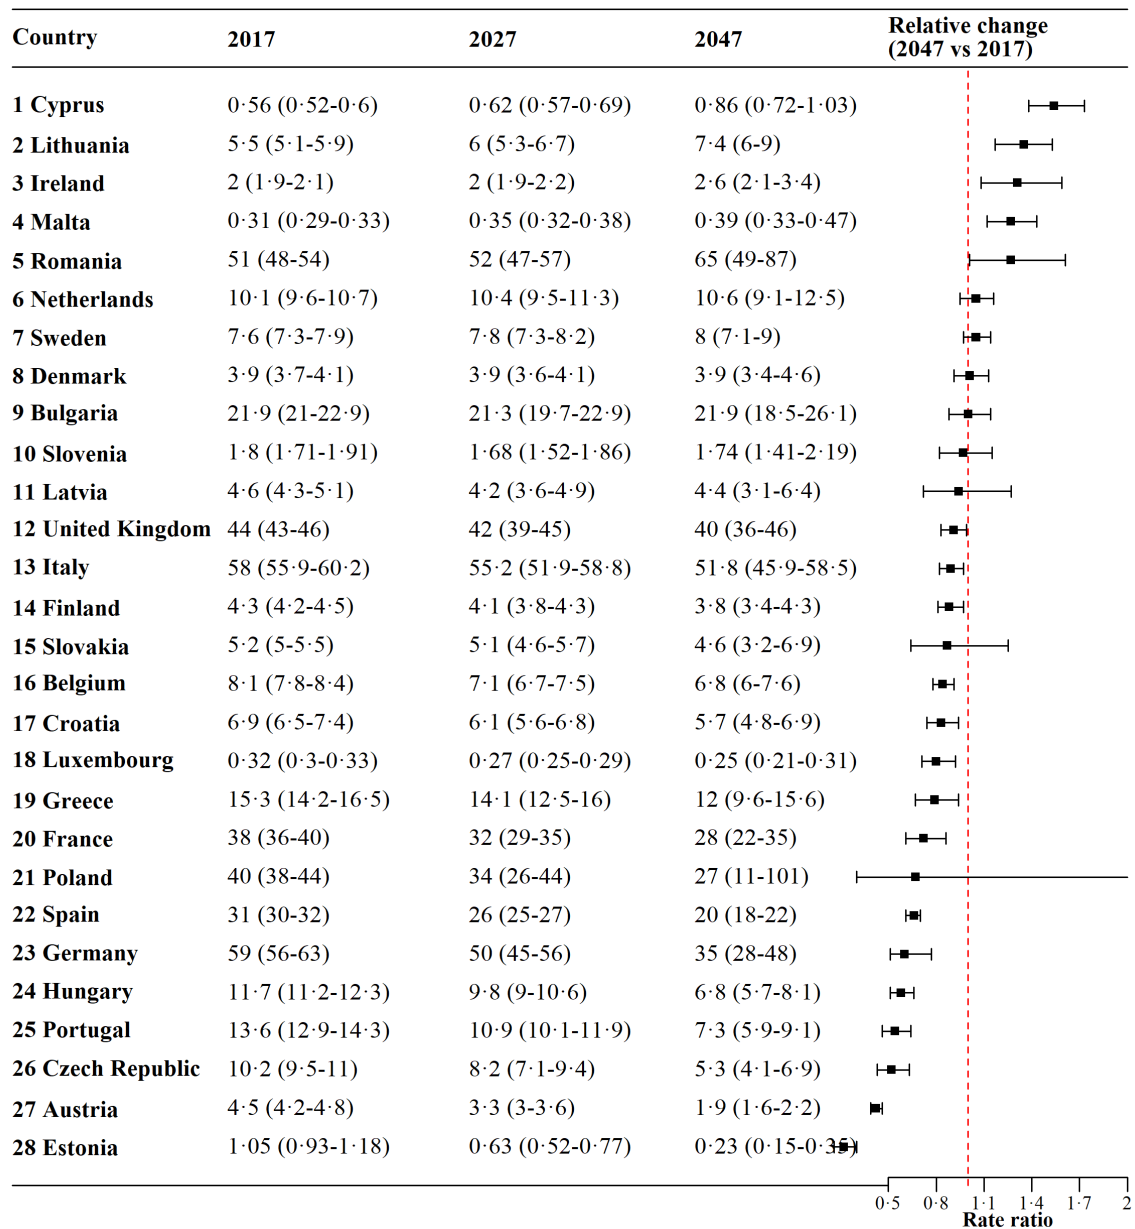

**Figure V: Projected number of stroke deaths (in thousands) between 2017 and 2047 in European countries.**

Data are counts in thousands (95% CI) as obtained from models.

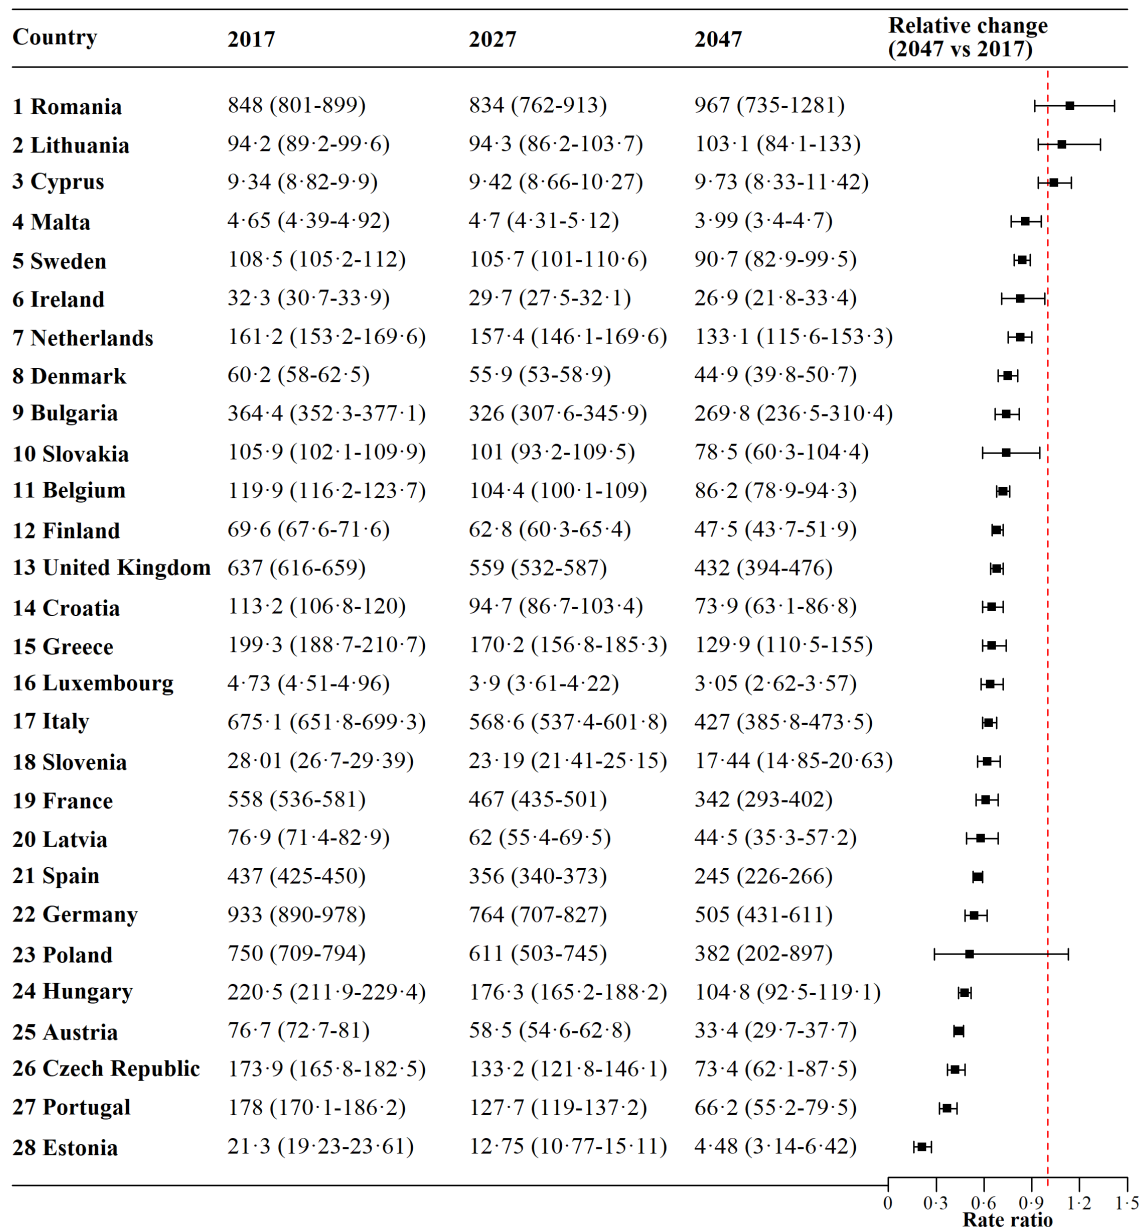

**Figure VI: Projected number of stroke DALYs (in thousands) between 2017 and 2047 in EU countries.**

Data are counts in thousands (95% CI) as obtained from models.

| 2017                        |                   | 2047              |                             | 2047 vs 2017           |
|-----------------------------|-------------------|-------------------|-----------------------------|------------------------|
| Age-adjusted rate* (95% CI) | Country           | Country           | Age-adjusted rate* (95% CI) | % Change (95% CI)      |
| 428 (414-442)               | 1 Romania         | 1 Lithuania       | 467 (425-512)               | 14.4 (7.7 to 21.3)     |
| 421 (402-442)               | 2 Latvia          | 2 Romania         | 382 (326-450)               | -10.6 (-21.2 to 1.9)   |
| 408 (395-422)               | 3 Lithuania       | 3 Latvia          | 368 (323-421)               | -12.6 (-19.5 to -4.7)  |
| 406 (396-417)               | 4 Bulgaria        | 4 Bulgaria        | 356 (324-391)               | -12.5 (-18 to -6.4)    |
| 348 (336-359)               | 5 Slovakia        | 5 Slovakia        | 278 (230-342)               | -19.9 (-31.6 to -4.8)  |
| 326 (313-341)               | 6 Croatia         | 6 Croatia         | 270 (240-303)               | -17.3 (-23.1 to -11)   |
| 293 (281-305)               | 7 Czech Republic  | 7 Poland          | 255 (214-327)               | -12.1 (-23.1 to 8.5)   |
| 290 (279-301)               | 8 Poland          | 8 Finland         | 244 (223-266)               | -7.9 (-12.6 to -2.9)   |
| 290 (279-301)               | 9 Hungary         | 9 Hungary         | 199 (177-224)               | -31.3 (-36.4 to -25.6) |
| 271 (260-282)               | 10 Estonia        | 10 Czech Republic | 196 (175-221)               | -33 (-37.9 to -27.4)   |
| 265 (256-274)               | 11 Finland        | 11 Austria        | 191 (172-213)               | -17.5 (-22.2 to -12.4) |
| 232 (225-239)               | 12 Greece         | 12 Estonia        | 181 (157-211)               | -33 (-39.8 to -25.3)   |
| 232 (221-243)               | 13 Austria        | 13 Belgium        | 164 (155-175)               | -17.9 (-20.9 to -14.7) |
| 204 (195-213)               | 14 Germany        | 14 Germany        | 160 (140-184)               | -21.5 (-28.2 to -13.8) |
| 201 (195-208)               | 15 Cyprus         | 15 Cyprus         | 159 (145-175)               | -21.1 (-25.5 to -16.2) |
| 200 (196-205)               | 16 Belgium        | 16 Sweden         | 154 (141-168)               | -20.2 (-24.5 to -15.5) |
| 200 (196-204)               | 17 Netherlands    | 17 Greece         | 151 (139-164)               | -35 (-38.1 to -31.4)   |
| 200 (192-208)               | 18 Slovenia       | 18 Netherlands    | 148 (139-157)               | -26.1 (-28.8 to -23.3) |
| 199 (195-203)               | 19 Denmark        | 19 Denmark        | 144 (135-155)               | -27.5 (-30.9 to -23.9) |
| 194 (188-200)               | 20 Portugal       | 20 Malta          | 132 (115-152)               | -30.5 (-36.5 to -23.8) |
| 193 (187-199)               | 21 Sweden         | 21 France         | 127 (115-142)               | -23 (-28.6 to -16.7)   |
| 190 (182-199)               | 22 Malta          | 22 Slovenia       | 121 (108-137)               | -39.4 (-43.9 to -34.3) |
| 182 (177-186)               | 23 Spain          | 23 Ireland        | 119 (102-140)               | -30.2 (-37.9 to -21.1) |
| 174 (168-181)               | 24 Luxembourg     | 24 Spain          | 119 (112-127)               | -34.3 (-36.9 to -31.6) |
| 171 (165-178)               | 25 Ireland        | 25 Luxembourg     | 119 (105-134)               | -32 (-37.2 to -26.1)   |
| 166 (161-171)               | 26 United Kingdom | 26 United Kingdom | 108 (100-116)               | -35 (-37.9 to -31.8)   |
| 165 (161-170)               | 27 France         | 27 Portugal       | 103 (91-117)                | -47.2 (-51.9 to -41.7) |
| 162 (156-169)               | 28 Italy          | 28 Italy          | 92 (82-104)                 | -43.1 (-47.1 to -38.8) |

**Figure VII: Age- and sex-adjusted incidence rate of stroke (per 100,000) in 2017 and 2047.**

\* adjusted to the 2013 European Standard Population.

| 2017                        |                   | 2047              |                             | 2047 vs 2017           |
|-----------------------------|-------------------|-------------------|-----------------------------|------------------------|
| Age-adjusted rate* (95% CI) | Country           | Country           | Age-adjusted rate* (95% CI) | % Change (95% CI)      |
| 367 (351-384)               | 1 Latvia          | 1 Lithuania       | 428 (401-456)               | 21 (16.3 to 25.7)      |
| 354 (345-363)               | 2 Lithuania       | 2 Bulgaria        | 385 (357-414)               | 11.1 (5.7 to 16.5)     |
| 346 (337-356)               | 3 Bulgaria        | 3 Latvia          | 353 (314-397)               | -3.8 (-10.6 to 3.6)    |
| 336 (325-348)               | 4 Romania         | 4 Slovakia        | 301 (254-363)               | 3.9 (-10.1 to 21.5)    |
| 290 (282-298)               | 5 Slovakia        | 5 Romania         | 300 (257-353)               | -10.7 (-21.1 to 1.7)   |
| 279 (268-291)               | 6 Hungary         | 6 Croatia         | 258 (228-292)               | -2.1 (-9.4 to 5.9)     |
| 264 (252-276)               | 7 Croatia         | 7 Finland         | 258 (240-278)               | 16.1 (10.9 to 21.7)    |
| 261 (250-271)               | 8 Estonia         | 8 Poland          | 234 (141-430)               | 0.2 (-36.2 to 74.7)    |
| 246 (236-257)               | 9 Czech Republic  | 9 Hungary         | 227 (201-258)               | -18.7 (-25.2 to -11.5) |
| 233 (221-246)               | 10 Poland         | 10 Austria        | 211 (187-237)               | 9.8 (2.7 to 17.2)      |
| 222 (216-228)               | 11 Finland        | 11 Germany        | 187 (165-212)               | 1.8 (-6.3 to 10.4)     |
| 194 (189-199)               | 12 Sweden         | 12 Czech Republic | 185 (163-211)               | -24.8 (-30.8 to -17.9) |
| 192 (182-202)               | 13 Austria        | 13 Sweden         | 181 (168-196)               | -6.4 (-10.8 to -1.8)   |
| 184 (176-192)               | 14 Germany        | 14 Belgium        | 172 (163-182)               | 0.8 (-2.7 to 4.2)      |
| 177 (174-179)               | 15 Netherlands    | 15 Estonia        | 170 (146-199)               | -34.7 (-41.7 to -26.6) |
| 175 (172-179)               | 16 Denmark        | 16 Netherlands    | 163 (156-170)               | -7.7 (-10.2 to -5)     |
| 174 (166-183)               | 17 Slovenia       | 17 Denmark        | 155 (146-165)               | -11.6 (-14.9 to -8)    |
| 174 (169-179)               | 18 Greece         | 18 Cyprus         | 153 (141-166)               | -6.4 (-11 to -1.5)     |
| 171 (167-174)               | 19 Belgium        | 19 France         | 148 (135-163)               | -3.1 (-9.1 to 3.3)     |
| 170 (167-174)               | 20 Portugal       | 20 Spain          | 146 (138-155)               | -9.8 (-13 to -6.5)     |
| 163 (158-169)               | 21 Cyprus         | 21 Luxembourg     | 146 (130-164)               | -8.8 (-15.6 to -1.4)   |
| 162 (159-165)               | 22 Spain          | 22 Greece         | 145 (135-156)               | -16.8 (-20.4 to -12.8) |
| 160 (155-165)               | 23 Ireland        | 23 Ireland        | 138 (123-154)               | -14 (-20.6 to -6.9)    |
| 160 (154-166)               | 24 Luxembourg     | 24 Slovenia       | 136 (119-157)               | -21.7 (-28.6 to -13.8) |
| 159 (155-162)               | 25 United Kingdom | 25 Malta          | 133 (116-152)               | -13.2 (-20.6 to -4.7)  |
| 153 (149-157)               | 26 France         | 26 United Kingdom | 127 (120-136)               | -19.8 (-22.6 to -16.6) |
| 153 (146-160)               | 27 Malta          | 27 Portugal       | 103 (95-112)                | -39.4 (-43.1 to -35.3) |
| 109 (105-113)               | 28 Italy          | 28 Italy          | 73 (66-82)                  | -32.9 (-37.5 to -27.9) |

**Figure VIII: Age- and sex-adjusted prevalence rate of stroke (per 10,000) in 2017 and 2047.**

\* adjusted to the 2013 European Standard Population.

| 2017                        |                   | 2047              |                             | 2047 vs 2017           |
|-----------------------------|-------------------|-------------------|-----------------------------|------------------------|
| Age-adjusted rate* (95% CI) | Country           | Country           | Age-adjusted rate* (95% CI) | % Change (95% CI)      |
| 321 (307-336)               | 1 Bulgaria        | 1 Bulgaria        | 267 (225-318)               | -16.8 (-26.7 to -5.2)  |
| 290 (273-307)               | 2 Romania         | 2 Romania         | 267 (199-362)               | -7.8 (-27.2 to 17.9)   |
| 233 (214-255)               | 3 Latvia          | 3 Lithuania       | 181 (148-219)               | -2.5 (-14.7 to 10.2)   |
| 186 (173-199)               | 4 Lithuania       | 4 Latvia          | 166 (118-241)               | -28.8 (-44.6 to -5.4)  |
| 164 (154-175)               | 5 Croatia         | 5 Croatia         | 88 (74-106)                 | -46.4 (-52.1 to -39.7) |
| 135 (128-142)               | 6 Hungary         | 6 Slovakia        | 61 (43-90)                  | -54.6 (-66.3 to -35.9) |
| 134 (128-141)               | 7 Slovakia        | 7 Hungary         | 53 (45-63)                  | -60.5 (-64.8 to -55.3) |
| 124 (116-134)               | 8 Poland          | 8 Greece          | 53 (43-68)                  | -54.5 (-60.5 to -46.2) |
| 117 (108-126)               | 9 Greece          | 9 Malta           | 46 (38-55)                  | -48.3 (-53.9 to -41.7) |
| 113 (108-119)               | 10 Portugal       | 10 Poland         | 42 (18-146)                 | -65.9 (-84.5 to 9.2)   |
| 112 (104-121)               | 11 Czech Republic | 11 Cyprus         | 42 (35-51)                  | -44.5 (-50.3 to -37.6) |
| 89 (84-94)                  | 12 Malta          | 12 Sweden         | 40 (35-45)                  | -46.5 (-50.5 to -41.9) |
| 86 (82-91)                  | 13 Slovenia       | 13 Slovenia       | 38 (31-47)                  | -56.2 (-62.4 to -48.5) |
| 78 (69-88)                  | 14 Estonia        | 14 Denmark        | 36 (31-42)                  | -51.1 (-55.9 to -45.7) |
| 76 (71-81)                  | 15 Cyprus         | 15 Italy          | 34 (30-38)                  | -53.7 (-57.3 to -49.7) |
| 75 (72-78)                  | 16 Finland        | 16 Finland        | 33 (29-37)                  | -56 (-59.3 to -52.2)   |
| 75 (72-78)                  | 17 Sweden         | 17 Portugal       | 33 (26-40)                  | -71.3 (-75.5 to -66.1) |
| 74 (71-78)                  | 18 Denmark        | 18 Czech Republic | 31 (24-40)                  | -72.3 (-76.7 to -66.8) |
| 73 (70-76)                  | 19 Italy          | 19 Ireland        | 30 (23-38)                  | -55.2 (-62.9 to -45.5) |
| 69 (65-72)                  | 20 Luxembourg     | 20 Netherlands    | 30 (25-35)                  | -54.2 (-58.7 to -49.2) |
| 68 (65-71)                  | 21 United Kingdom | 21 United Kingdom | 30 (26-34)                  | -56.4 (-59.7 to -52.4) |
| 67 (64-70)                  | 22 Belgium        | 22 Belgium        | 29 (26-33)                  | -56.6 (-59.6 to -53.2) |
| 67 (63-70)                  | 23 Ireland        | 23 Luxembourg     | 22 (18-26)                  | -68.2 (-72 to -63.6)   |
| 65 (61-69)                  | 24 Netherlands    | 24 Germany        | 20 (16-27)                  | -67.6 (-72.2 to -59.4) |
| 62 (58-66)                  | 25 Germany        | 25 France         | 19 (16-23)                  | -62.3 (-67.5 to -55.7) |
| 57 (55-58)                  | 26 Spain          | 26 Spain          | 18 (17-20)                  | -67.8 (-69.8 to -65.6) |
| 50 (48-53)                  | 27 France         | 27 Estonia        | 11 (7-17)                   | -85.9 (-89.6 to -80.8) |
| 50 (47-53)                  | 28 Austria        | 28 Austria        | 10 (9-12)                   | -79.5 (-81.2 to -77.6) |

**Figure IX: Age- and sex-adjusted mortality rate of stroke (per 100,000) in 2017 and 2047.**

\* adjusted to the 2013 European Standard Population.

| 2017                        |                   | 2047              |                             | 2047 vs 2017           |
|-----------------------------|-------------------|-------------------|-----------------------------|------------------------|
| Age-adjusted rate* (95% CI) | Country           | Country           | Age-adjusted rate* (95% CI) | % Change (95% CI)      |
| 502 (485-520)               | 1 Bulgaria        | 1 Romania         | 429 (323-575)               | -7 (-25.9 to 17.8)     |
| 461 (436-488)               | 2 Romania         | 2 Bulgaria        | 346 (304-398)               | -31 (-37.3 to -23.5)   |
| 382 (354-412)               | 3 Latvia          | 3 Lithuania       | 293 (243-367)               | -8.7 (-20.1 to 8.4)    |
| 320 (304-339)               | 4 Lithuania       | 4 Latvia          | 199 (158-253)               | -47.9 (-55.3 to -38.6) |
| 264 (249-280)               | 5 Croatia         | 5 Croatia         | 129 (111-152)               | -51 (-55.6 to -45.9)   |
| 241 (232-250)               | 6 Slovakia        | 6 Slovakia        | 114 (88-150)                | -52.8 (-62.1 to -40.2) |
| 238 (229-248)               | 7 Hungary         | 7 Hungary         | 91 (81-103)                 | -61.7 (-64.7 to -58.4) |
| 218 (206-231)               | 8 Poland          | 8 Poland          | 74 (40-159)                 | -66.3 (-80.6 to -31.1) |
| 178 (169-187)               | 9 Czech Republic  | 9 Greece          | 70 (61-82)                  | -56.2 (-60.1 to -51.5) |
| 160 (145-178)               | 10 Estonia        | 10 Malta          | 56 (48-66)                  | -53.2 (-57.8 to -48)   |
| 160 (152-169)               | 11 Greece         | 11 Sweden         | 55 (50-60)                  | -49.4 (-52.3 to -46.4) |
| 153 (146-160)               | 12 Portugal       | 12 Cyprus         | 53 (46-62)                  | -52.5 (-56.8 to -47.7) |
| 133 (127-140)               | 13 Slovenia       | 13 Finland        | 52 (48-57)                  | -56.9 (-59 to -54.6)   |
| 121 (118-125)               | 14 Finland        | 14 Denmark        | 50 (44-56)                  | -54.6 (-58.2 to -50.7) |
| 120 (114-127)               | 15 Malta          | 15 Czech Republic | 49 (42-57)                  | -72.5 (-75.2 to -69.2) |
| 112 (106-119)               | 16 Cyprus         | 16 Netherlands    | 47 (41-54)                  | -52.8 (-56.8 to -48.3) |
| 110 (106-114)               | 17 Denmark        | 17 Belgium        | 46 (43-50)                  | -55.7 (-57.9 to -53.3) |
| 109 (106-112)               | 18 Sweden         | 18 Slovenia       | 46 (39-54)                  | -65.5 (-68.9 to -61.5) |
| 104 (101-108)               | 19 Belgium        | 19 United Kingdom | 40 (36-44)                  | -60.1 (-62.3 to -57.6) |
| 101 (96-106)                | 20 Luxembourg     | 20 Portugal       | 37 (31-44)                  | -75.8 (-78.8 to -72.3) |
| 100 (95-105)                | 21 Germany        | 21 Germany        | 37 (32-44)                  | -63 (-66.7 to -58.1)   |
| 100 (95-105)                | 22 Netherlands    | 22 Italy          | 35 (31-39)                  | -62 (-64.5 to -59.3)   |
| 99 (96-103)                 | 23 United Kingdom | 23 Ireland        | 34 (28-43)                  | -63.4 (-68.8 to -56.7) |
| 94 (89-99)                  | 24 Ireland        | 24 France         | 34 (30-39)                  | -58.6 (-62.4 to -54.2) |
| 92 (88-95)                  | 25 Italy          | 25 Luxembourg     | 30 (26-35)                  | -70.1 (-73 to -66.7)   |
| 87 (85-90)                  | 26 Spain          | 26 Spain          | 29 (27-32)                  | -66.3 (-67.9 to -64.5) |
| 86 (81-91)                  | 27 Austria        | 27 Estonia        | 26 (18-38)                  | -83.5 (-87.3 to -78.5) |
| 82 (79-85)                  | 28 France         | 28 Austria        | 23 (20-26)                  | -73.2 (-74.9 to -71.2) |

**Figure X: Age- and sex-adjusted rate of DALYs lost because of stroke (per 10,000) in 2017 and 2047.**

\* adjusted to the 2013 European Standard Population.
